# Supplementary material for: Magnetic ordering in a mononuclear cobalt(ii) complex containing a Schiff-base pentadentate ligand
Source: Royal Society of Chemistry journal article supplement (doi:10.1039/b500625b), 2005-01-01
Supplement: b500625b.pdf [file b500625b.pdf]

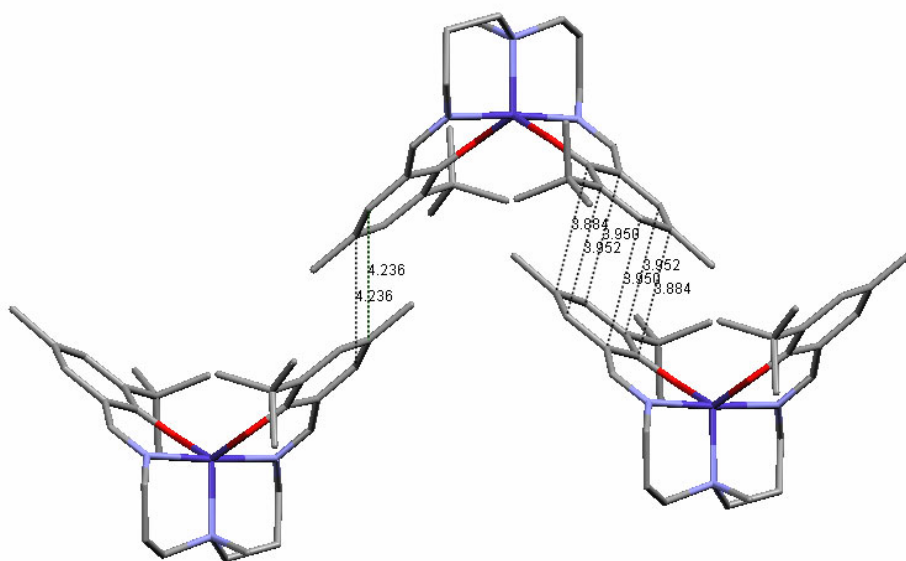

**Figure S1** A packing diagram of **1** (hydrogen atoms omitted for clarity) showing ring interaction at ca 4 Å.

|                          | low temperature, 90 K   |        | room temperature, 296 K |        |
|--------------------------|-------------------------|--------|-------------------------|--------|
| Formula                  | C31 H45 Co N3 O2        |        | C31 H45 Co N3 O2        |        |
| <i>M</i>                 | 550.63                  |        | 550.63                  |        |
| Crystal system           | triclinic               |        | triclinic               |        |
| space group              | P-1                     |        | P-1                     |        |
| <i>a</i> / Å             | 9.5337(6)               |        | 9.563(3)                |        |
| <i>b</i> / Å             | 11.7923(8)              |        | 12.063(1)               |        |
| <i>c</i> / Å             | 13.7991(10)             |        | 13.857(3)               |        |
| $\alpha$ / °             | 92.836(3)               |        | 93.60(1)                |        |
| $\beta$ / °              | 109.513(3)              |        | 109.05(2)               |        |
| $\gamma$ / °             | 99.029(3)               |        | 99.36(1)                |        |
| <i>V</i> /Å <sup>3</sup> | 1435.46(17)             |        | 1479.3(6)               |        |
| <i>Z</i>                 | 2                       |        | 2                       |        |
| $\mu$ /mm <sup>-1</sup>  | 0.630                   |        | 0.607                   |        |
| $\lambda$                | 0.71073                 |        | 0.71069                 |        |
| Reflections              | 5040                    |        | 4118                    |        |
| collected/unique         | 3815                    |        | 3367                    |        |
|                          | refine_ls_R_factor_all  | 0.0574 | refine_ls_R_factor_all  | 0.0486 |
|                          | refine_ls_R_factor_gt   | 0.0357 | refine_ls_R_factor_obs  | 0.0341 |
|                          | refine_ls_wR_factor_ref | 0.0843 | refine_ls_wR_factor_all | 0.0979 |
|                          | refine_ls_wR_factor_gt  | 0.0772 | refine_ls_wR_factor_obs | 0.0895 |
| Distances within         | O1 Co1 1.9527(15)       |        | Co1 O1 1.944(2)         |        |
| the chromophore          | O2 Co1 1.9580(15)       |        | Co1 O2 1.952(2)         |        |
| (different atom          | N1 Co1 2.0516(18)       |        | Co1 N1 2.045(2)         |        |
| labeling for N1 and      | N2 Co1 2.1106(19)       |        | Co1 N2 2.123(2)         |        |
| N3)                      | N3 Co1 2.0578(18)       |        | Co1 N3 2.054(2)         |        |

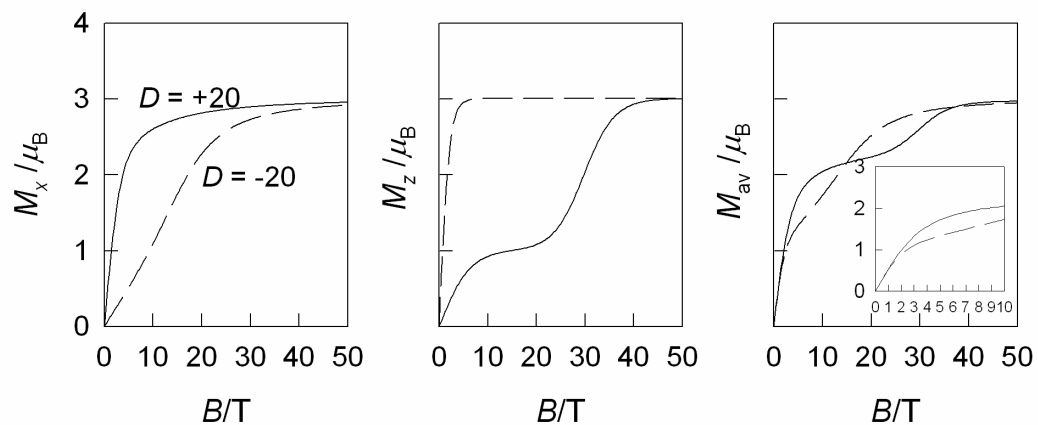

**Figure S2** Modeling the components of the magnetization and its powder average using the exact partition function for the  $S = 3/2$  system. Solid – positive  $D$ , dashed – negative  $D$  (in units of  $\text{cm}^{-1}$ );  $T = 4.2$  K and  $g = 2$ . Saturation is not reached until  $B = 10$  T.

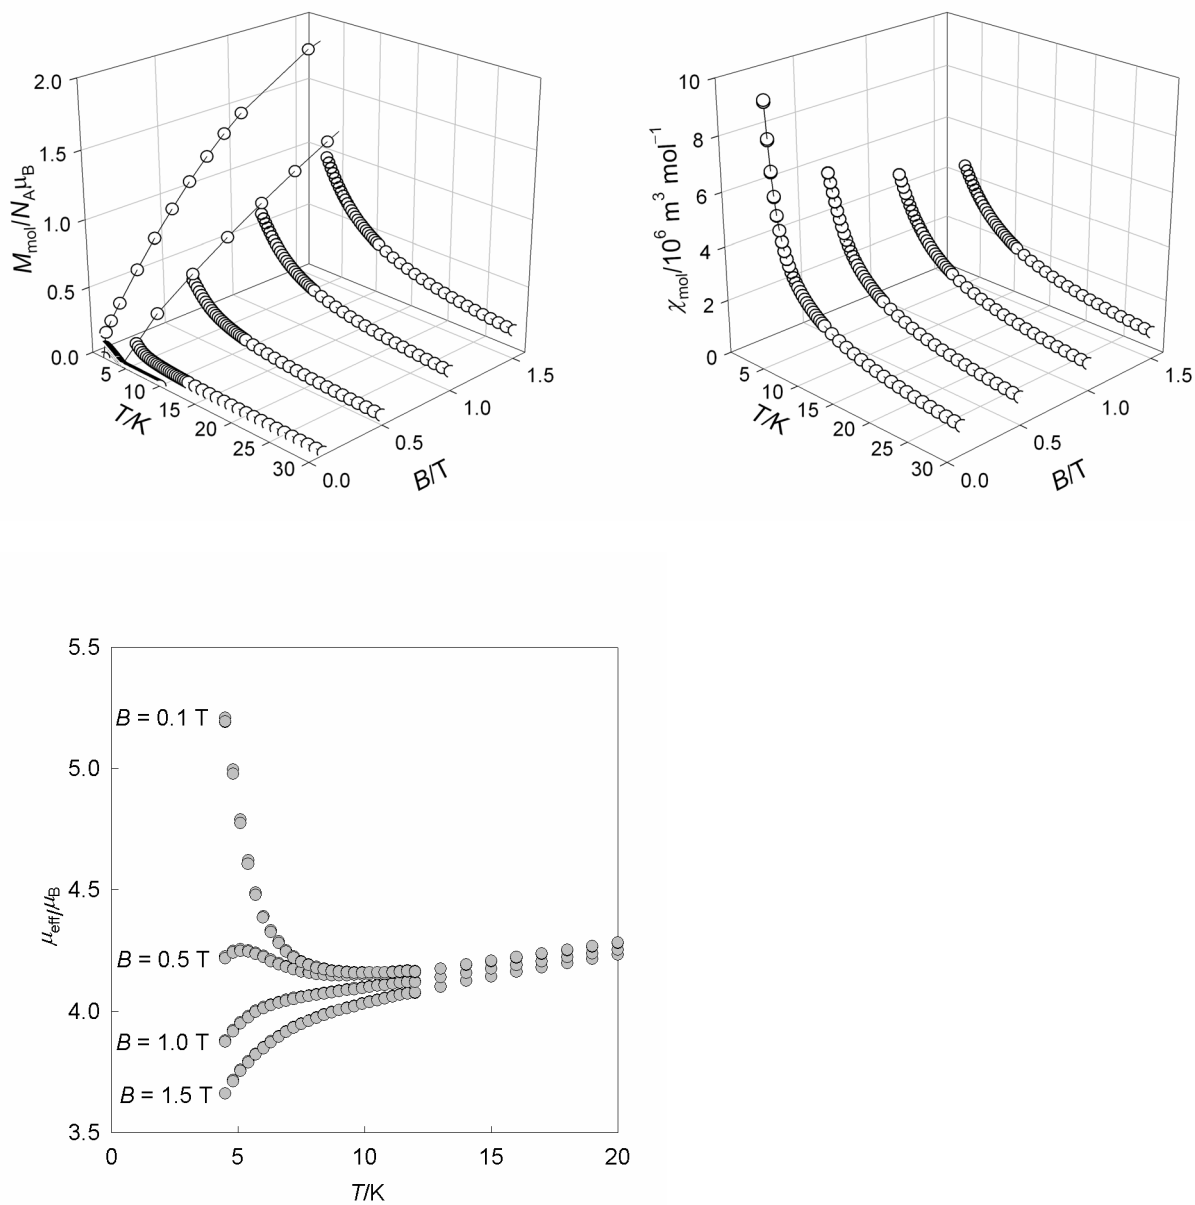

**Figure S3** Temperature-field dependence of magnetization (top-left), mean magnetic susceptibility based upon magnetization (top-right) and effective magnetic moment (bottom-left) for **1**.

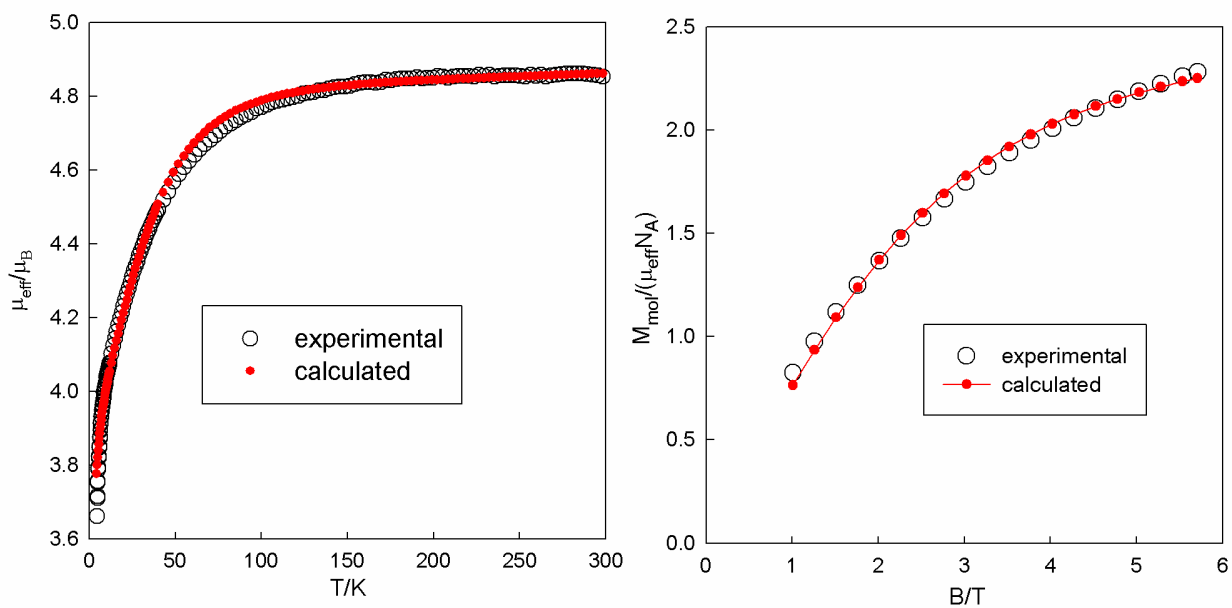

**Figure S4** A simultaneous fit of the magnetic functions: Effective magnetic moment (SQUID,  $B = 1.5$  T) – right. Magnetization at  $T = 4.38$  K (left). Empty circles – experimental data; solid lines – calculated data.
